# Supplementary material for: Metformin prevents the pathological browning of subcutaneous white adipose tissue
Source: PubMed Central journal article supplement — Mol Metab. 2019 Aug 20;29:12–23. doi: 10.1016/j.molmet.2019.08.011 (PMC6728757; doi:10.1016/j.molmet.2019.08.011), 2019-08-20
Supplement: mmc1.pdf [file mmc1.pdf]

Supplementary Figure 1

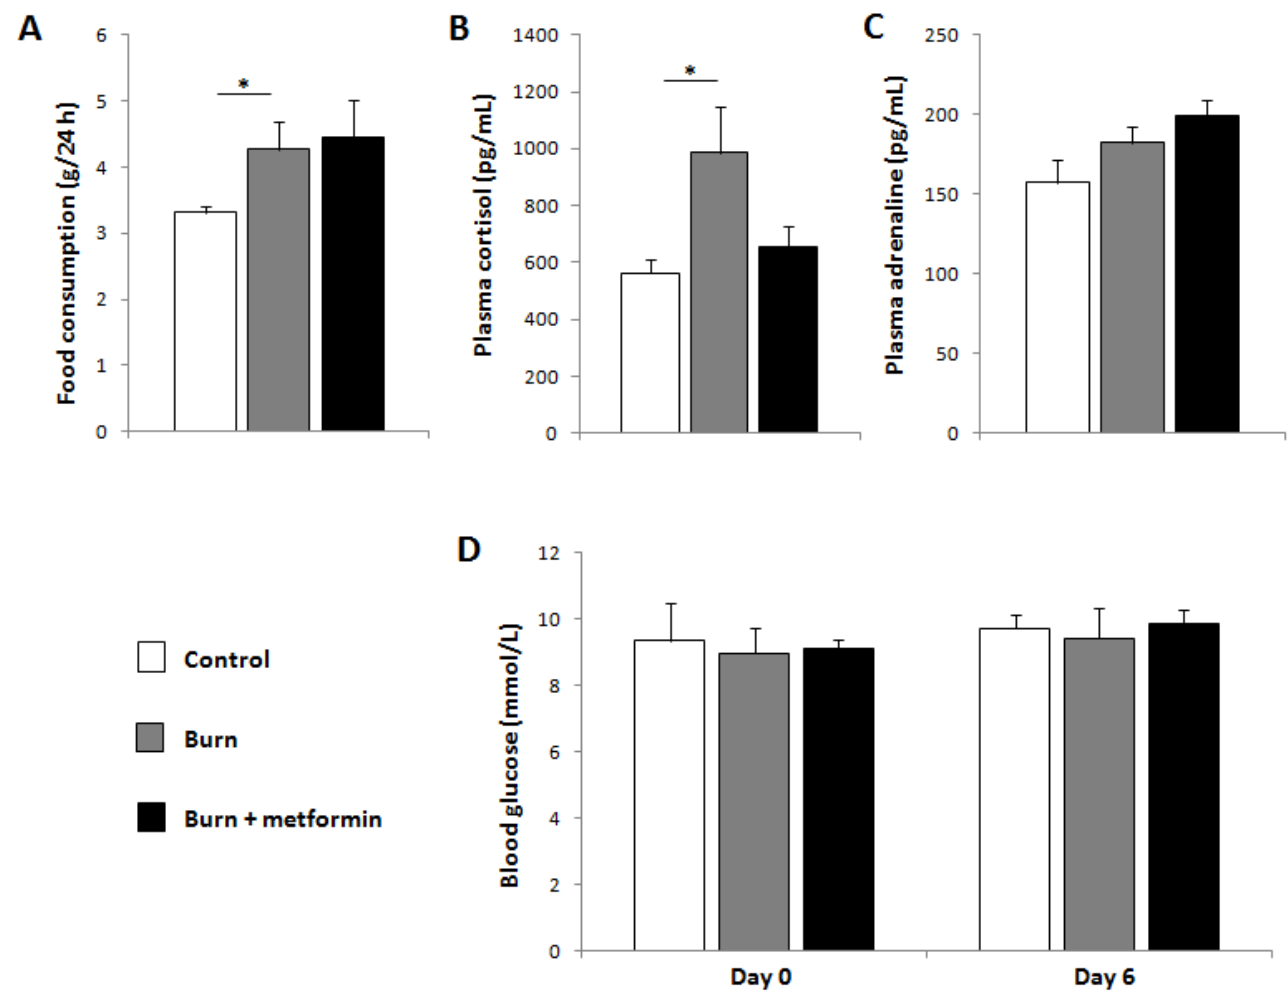

**Supplementary Figure 1:** Metformin does not significantly alter food consumption, stress hormones or plasma glucose post-burn. **(A)** Food consumption rates as expressed as g / 24h following thermal trauma. **(B)** Plasma cortisol at euthanasia (day 7) measured via ELISA **(C)** Plasma adrenaline at euthanasia (day 7) measured via ELISA. **(D)** Blood glucose levels as measured following tail-tip amputation with a glucometer (OneTouch UltraMini) . ■: control (n = 6); ■: burn (n = 6); ■: burn + metformin treatment (n = 6). Values are presented as mean ± standard error. \*p ≤ 0.05.

# Supplementary Figure 2

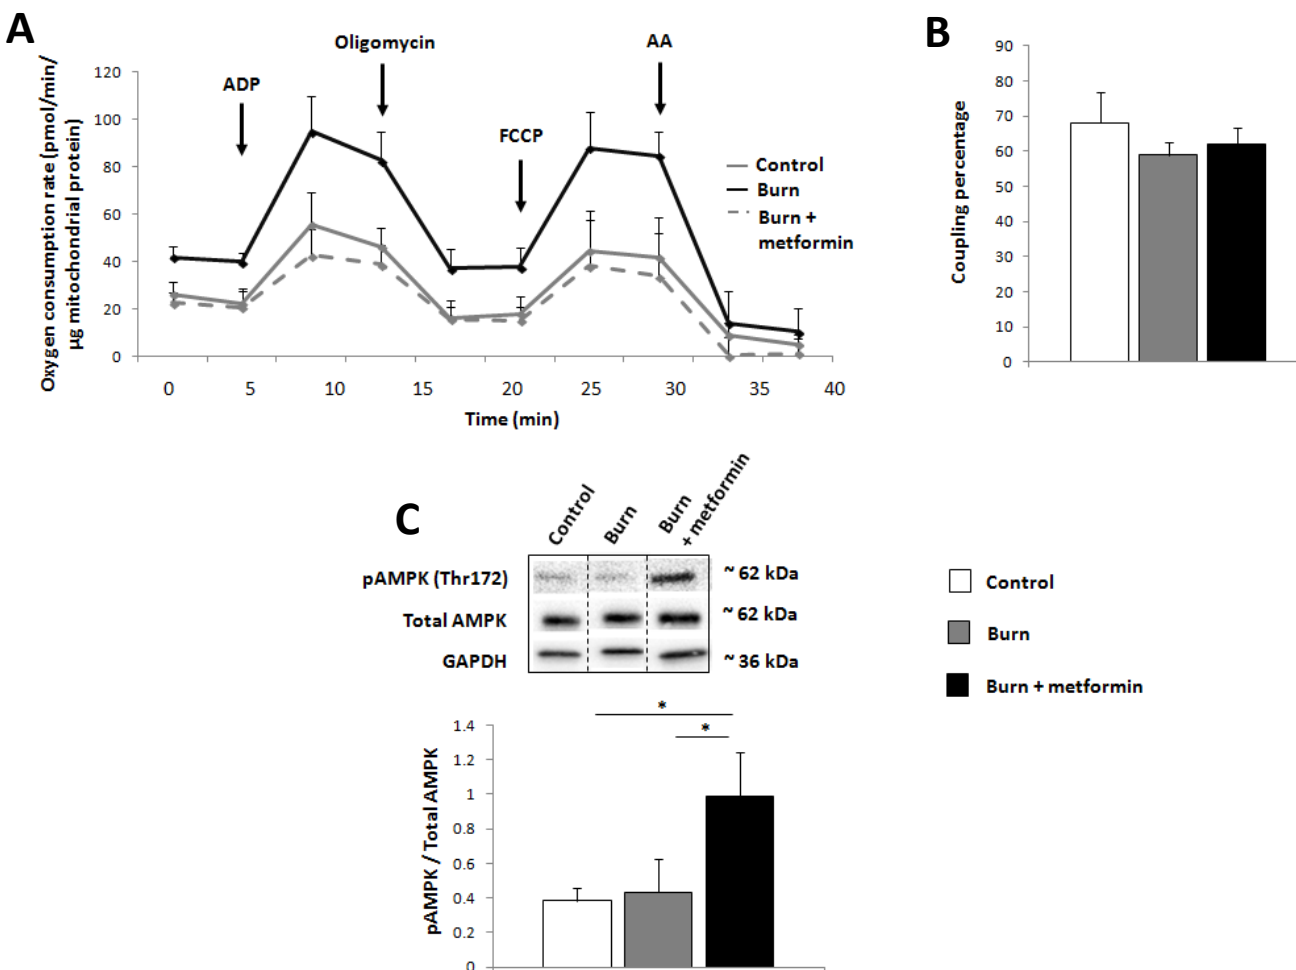

**Supplementary Figure 2:** Metformin decreases liver mitochondrial respiration, activating AMPK following thermal injury. **(A)** Seahorse XF96 respiration profiles of liver mitochondria from control mice (grey), mice subjected to thermal injury (black) and injured mice treated with metformin (100 mg/kg; blue). **(B)** Percentage of the electron transport chain coupled to ATP synthesis as measured by the Seahorse XF stress test report generator. **(C)** Cropped representative Western blot of phosphorylated AMP-activated protein kinase (Thr 172; p-AMPK / t-AMPK) in liver. Densitometric measurements of Western blots were performed using ImageJ. ■: control (n = 8); ■: burn (n = 8); ■: burn + metformin treatment (n = 8). Values are presented as mean  $\pm$  standard error. \* $p \leq 0.05$ .

# Supplementary Figure 3

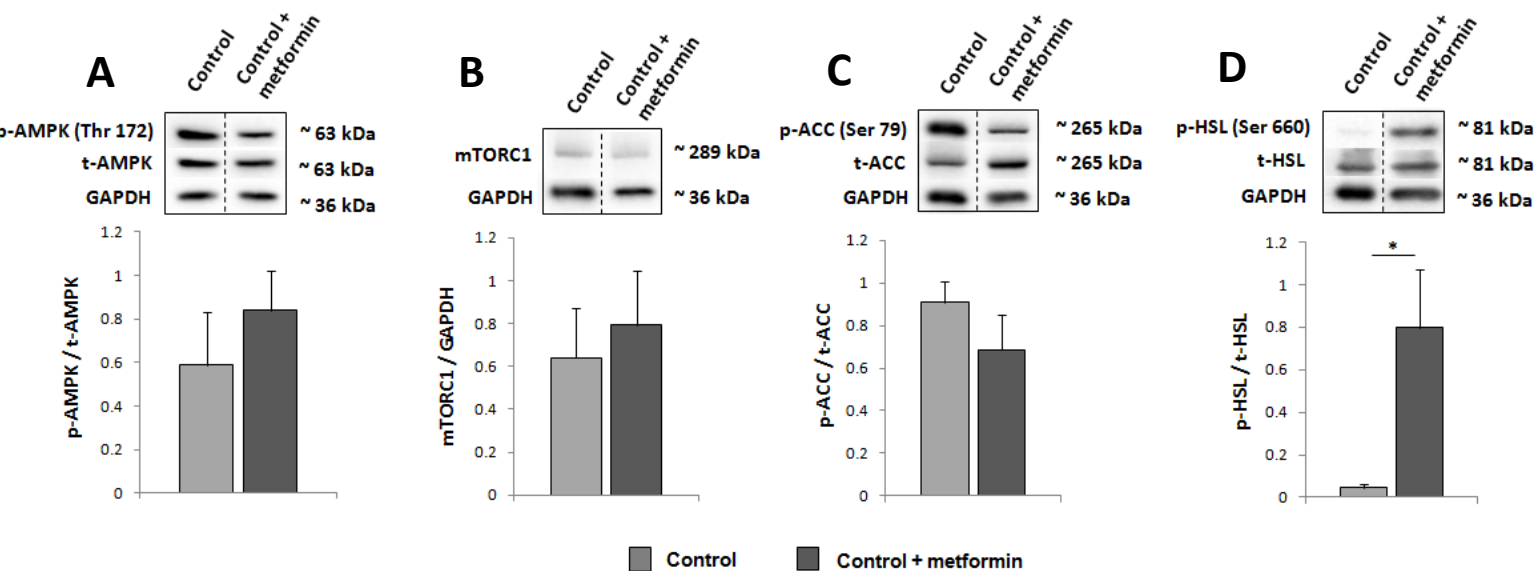

**Supplementary Figure 3:** Metformin does not reduce lipolysis and  $\beta$ -oxidation in the inguinal white adipose tissue (iWAT) of murine controls. **(A-D)** Representative Western blots of phosphorylated AMP-activated protein kinase (Thr 172; p-AMPK / t-AMPK), mammalian target of rapamycin complex 1 (mTORC1), phosphorylated acetyl-CoA carboxylase (Ser 79; p-ACC / t-ACC) and phosphorylated hormone sensitive lipase (Ser 660; p-HSL / t-HSL) in iWAT. Densitometric measurements of Western blots were performed using ImageJ. ■: control (n = 8); ■: control + metformin (100 mg/kg; n = 8). Values are presented as mean  $\pm$  standard error. \*p  $\leq$  0.05.

# Supplementary Figure 4

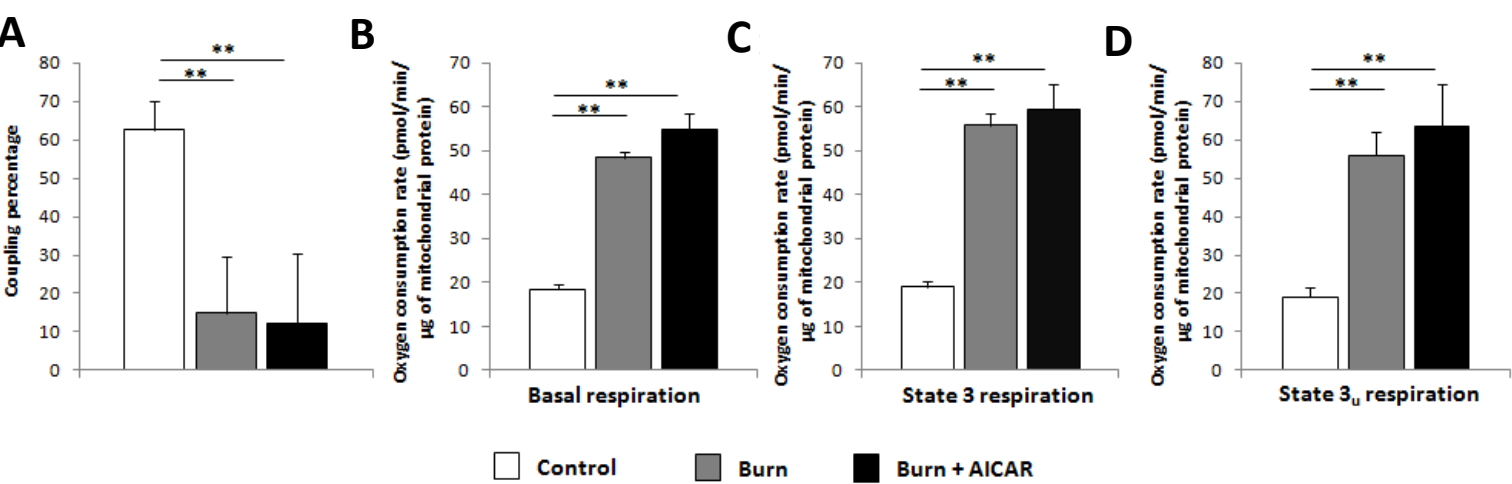

**Supplementary Figure 4:** 5-aminoimidazole-4-carboxamide ribonucleotide (AICAR) has no effect on electron transport chain coupling and respiration when compared to burn alone. **(A)** Percentage of the electron transport chain coupled to ATP synthesis as measured by the Seahorse XF stress test report generator. Basal **(B)**, state 3 **(C)** and state 3<sub>u</sub> **(D)** respiration parameters in isolated mitochondria as measured via Seahorse XF96 extracellular flux assays. ■: control (n = 8); ■: burn (n = 8); ■: burn + AICAR treatment (n = 8). Values are presented as mean ± standard error. \*\*p ≤ 0.01.
